# Supplementary material for: Identification of m7G-associated lncRNA prognostic signature for predicting the immune status in cutaneous melanoma
Source: Aging (Albany NY). 2022 Jun 29;14(12):5233–49. doi: 10.18632/aging.204151 (PMC9271298; doi:10.18632/aging.204151)
Supplement: Supplementary Table 1 [file aging-14-204151-s001.xlsx]

## Sheet: corResult
Supplementary Table 1. Specific m7G methylation complexes METTL1 and WDR4.
Cuproptosis-related genes	lncRNA	Correlation	P-value	Regulation
METTL1	AC087741.2	0.211773	3.54e-06	postive
METTL1	AC011481.1	0.436197	2.68e-23	postive
WDR4	AC011481.1	0.463157	2.03e-26	postive
METTL1	ITFG2-AS1	0.209577	4.49e-06	postive
WDR4	ITFG2-AS1	0.238154	1.69e-07	postive
WDR4	AC104825.1	-0.260988	8.98e-09	negative
METTL1	AC093249.6	0.202166	9.8e-06	postive
WDR4	AC093249.6	0.260667	9.38e-09	postive
METTL1	HCG27	-0.244692	7.52e-08	negative
WDR4	HCG27	-0.296937	4.83e-11	negative
WDR4	LINC02384	-0.221887	1.15e-06	negative
METTL1	AL662844.3	-0.268262	3.31e-09	negative
WDR4	AL662844.3	-0.2724	1.85e-09	negative
METTL1	MIR100HG	-0.218279	1.73e-06	negative
WDR4	AC006042.1	-0.234412	2.67e-07	negative
METTL1	AL023803.1	0.256875	1.56e-08	postive
METTL1	LINC01275	0.240964	1.2e-07	postive
METTL1	AC087276.1	-0.209019	4.77e-06	negative
METTL1	AL121906.2	0.210223	4.19e-06	postive
METTL1	AP000941.1	-0.207396	5.67e-06	negative
METTL1	AC008608.2	0.311312	4.82e-12	postive
METTL1	AC079336.2	0.227406	6.11e-07	postive
METTL1	AC090948.2	-0.24303	9.26e-08	negative
METTL1	AL031670.1	-0.286256	2.47e-10	negative
METTL1	AC124312.2	-0.246988	5.62e-08	negative
METTL1	AP000766.1	-0.230487	4.26e-07	negative
METTL1	AC012306.2	0.299541	3.21e-11	postive
WDR4	AC012306.2	0.253678	2.37e-08	postive
METTL1	AP005205.2	0.369701	1.06e-16	postive
WDR4	AL161772.1	0.291902	1.05e-10	postive
METTL1	AC022034.1	-0.288641	1.73e-10	negative
WDR4	AC022034.1	-0.247589	5.21e-08	negative
METTL1	MINCR	0.20216	9.8e-06	postive
WDR4	MINCR	0.271904	1.99e-09	postive
WDR4	AP000320.1	0.214447	2.65e-06	postive
WDR4	C9orf147	0.20854	5.02e-06	postive
METTL1	AC091982.3	0.202124	9.84e-06	postive
WDR4	AP003392.4	0.252687	2.7e-08	postive
METTL1	CIRBP-AS1	0.285362	2.82e-10	postive
METTL1	BRWD1-AS2	0.289584	1.5e-10	postive
WDR4	BRWD1-AS2	0.261002	8.96e-09	postive
WDR4	AC109347.2	-0.207602	5.54e-06	negative
WDR4	LINC02019	-0.222134	1.12e-06	negative
METTL1	PCBP1-AS1	-0.246739	5.8e-08	negative
METTL1	AF127936.1	-0.289818	1.44e-10	negative
WDR4	AF127936.1	-0.236433	2.09e-07	negative
METTL1	RASAL2-AS1	0.231717	3.68e-07	postive
METTL1	RBAKDN	0.204236	7.9e-06	postive
METTL1	AL359711.2	0.217047	1.99e-06	postive
METTL1	PRRT3-AS1	0.274946	1.29e-09	postive
WDR4	PRRT3-AS1	0.314829	2.69e-12	postive
WDR4	H19	0.216674	2.07e-06	postive
METTL1	AC114271.1	0.243996	8.21e-08	postive
WDR4	AC114271.1	0.349361	5.75e-15	postive
METTL1	LINC02613	0.217598	1.87e-06	postive
METTL1	AL121772.3	-0.214415	2.66e-06	negative
WDR4	AL158163.2	-0.207369	5.68e-06	negative
METTL1	MAFG-DT	0.271611	2.07e-09	postive
METTL1	LINC01465	0.23434	2.69e-07	postive
METTL1	AC025287.2	0.21981	1.46e-06	postive
WDR4	MIATNB	0.222812	1.04e-06	postive
METTL1	TFAP2A-AS1	0.269376	2.84e-09	postive
WDR4	TFAP2A-AS1	0.200776	1.13e-05	postive
METTL1	AC100786.1	0.243389	8.86e-08	postive
METTL1	LINC00520	0.320416	1.05e-12	postive
METTL1	AP001893.1	-0.205473	6.94e-06	negative
WDR4	AL583856.2	-0.22934	4.87e-07	negative
WDR4	AC233992.3	0.304638	1.43e-11	postive
METTL1	PIK3CD-AS2	0.264718	5.41e-09	postive
WDR4	PIK3CD-AS2	0.25065	3.52e-08	postive
METTL1	AL117335.1	0.294755	6.78e-11	postive
WDR4	AL117335.1	0.250717	3.49e-08	postive
METTL1	ST20-AS1	0.275216	1.24e-09	postive
WDR4	ST20-AS1	0.221694	1.18e-06	postive
WDR4	AL645728.1	0.228387	5.45e-07	postive
METTL1	WWTR1-AS1	0.238933	1.54e-07	postive
WDR4	WWTR1-AS1	0.25039	3.64e-08	postive
METTL1	AL391069.2	0.280233	6.01e-10	postive
METTL1	AL445524.1	0.295579	5.97e-11	postive
WDR4	LINC00665	0.242347	1.01e-07	postive
METTL1	AC006942.1	0.313528	3.34e-12	postive
METTL1	AC091180.5	-0.202759	9.21e-06	negative
METTL1	AC104083.1	-0.220519	1.35e-06	negative
WDR4	AC104083.1	-0.20195	1e-05	negative
METTL1	AL163051.1	0.29027	1.35e-10	postive
WDR4	AL163051.1	0.213224	3.03e-06	postive
WDR4	AL133355.1	-0.210483	4.07e-06	negative
METTL1	AL353719.1	0.202409	9.55e-06	postive
WDR4	AC055720.2	-0.225922	7.26e-07	negative
METTL1	AC026803.1	0.215775	2.29e-06	postive
WDR4	LINC00294	-0.200419	1.17e-05	negative
METTL1	AC008115.3	-0.21836	1.72e-06	negative
WDR4	AC008115.3	-0.226274	6.97e-07	negative
METTL1	AP001505.1	0.367121	1.79e-16	postive
WDR4	AP001505.1	0.210238	4.18e-06	postive
METTL1	MELTF-AS1	0.205414	6.98e-06	postive
METTL1	ZSCAN16-AS1	0.227113	6.32e-07	postive
METTL1	HHLA3	0.201387	1.06e-05	postive
METTL1	LINC02166	0.310859	5.19e-12	postive
WDR4	LINC02166	0.267238	3.82e-09	postive
WDR4	AC104521.1	0.212855	3.15e-06	postive
METTL1	LINC01569	0.211441	3.67e-06	postive
METTL1	EXOC3-AS1	0.22122	1.24e-06	postive
METTL1	LAMC1-AS1	-0.208035	5.29e-06	negative
WDR4	AL357079.1	0.200217	1.2e-05	postive
METTL1	AC004812.2	0.283673	3.63e-10	postive
METTL1	SNHG17	0.257432	1.45e-08	postive
WDR4	SNHG17	0.250955	3.38e-08	postive
METTL1	AC124068.2	0.202874	9.1e-06	postive
METTL1	AC006566.1	0.252288	2.84e-08	postive
WDR4	PRR7-AS1	0.219796	1.46e-06	postive
METTL1	GTSE1-DT	0.206528	6.21e-06	postive
METTL1	AL139384.1	0.211894	3.5e-06	postive
WDR4	MIRLET7BHG	0.255541	1.86e-08	postive
METTL1	AL139246.5	0.251739	3.05e-08	postive
METTL1	AL442663.3	0.205187	7.15e-06	postive
METTL1	AC018653.3	-0.211125	3.8e-06	negative
METTL1	AC026304.1	0.252907	2.62e-08	postive
METTL1	AC025154.2	0.230785	4.11e-07	postive
METTL1	AC009061.2	0.209925	4.33e-06	postive
METTL1	LINC01357	0.218721	1.65e-06	postive
METTL1	A1BG-AS1	0.248324	4.74e-08	postive
WDR4	LINC02298	0.221848	1.16e-06	postive
WDR4	AC036108.3	-0.200286	1.19e-05	negative
METTL1	AL355338.1	0.285889	2.61e-10	postive
WDR4	AL355338.1	0.254379	2.16e-08	postive
METTL1	AC010531.6	0.243515	8.72e-08	postive
METTL1	MCCC1-AS1	-0.212879	3.14e-06	negative
METTL1	MAN1B1-DT	0.200206	1.2e-05	postive
METTL1	HOXC-AS1	0.259465	1.1e-08	postive
METTL1	AC010894.2	0.304299	1.51e-11	postive
WDR4	AL356299.2	0.206151	6.46e-06	postive
METTL1	DLGAP1-AS1	0.20308	8.91e-06	postive
METTL1	AL109659.2	-0.222052	1.13e-06	negative
WDR4	AL109659.2	-0.257137	1.5e-08	negative
METTL1	AC026124.2	0.210891	3.9e-06	postive
METTL1	AC010327.5	0.255595	1.84e-08	postive
METTL1	TMPO-AS1	0.25547	1.87e-08	postive
WDR4	TMPO-AS1	0.240515	1.27e-07	postive
WDR4	AC109347.1	-0.275716	1.16e-09	negative
METTL1	AL512306.2	-0.217737	1.84e-06	negative
WDR4	AL512306.2	-0.247156	5.5e-08	negative
METTL1	SH3BP5-AS1	-0.246136	6.27e-08	negative
WDR4	SH3BP5-AS1	-0.293311	8.47e-11	negative
METTL1	AC145207.5	0.236652	2.03e-07	postive
WDR4	AC009120.2	-0.264638	5.47e-09	negative
METTL1	MIR4435-2HG	0.245912	6.45e-08	postive
METTL1	AC098484.1	-0.203702	8.35e-06	negative
METTL1	AC009171.2	0.29848	3.79e-11	postive
METTL1	AC080013.4	-0.212508	3.27e-06	negative
WDR4	AL390195.2	-0.215963	2.24e-06	negative
METTL1	COA6-AS1	0.209709	4.43e-06	postive
METTL1	IDH1-AS1	0.227389	6.12e-07	postive
WDR4	MMP2-AS1	-0.225241	7.86e-07	negative
WDR4	LINC00896	0.229551	4.75e-07	postive
WDR4	CR381653.1	0.213033	3.09e-06	postive
METTL1	AC005034.5	-0.218101	1.77e-06	negative
METTL1	AC053513.1	-0.282432	4.36e-10	negative
METTL1	AL117332.1	0.281664	4.88e-10	postive
WDR4	AL117332.1	0.278387	7.87e-10	postive
WDR4	AL592166.1	0.227371	6.14e-07	postive
WDR4	PCED1B-AS1	-0.202645	9.32e-06	negative
METTL1	AC093726.1	-0.23135	3.84e-07	negative
WDR4	AC093726.1	-0.369617	1.08e-16	negative
WDR4	AC064807.1	0.244733	7.48e-08	postive
METTL1	AL162457.2	0.262056	7.77e-09	postive
METTL1	AC007448.3	0.271388	2.14e-09	postive
METTL1	AC005288.1	-0.28386	3.53e-10	negative
METTL1	AL031846.2	-0.382287	7.73e-18	negative
WDR4	AL031846.2	-0.291282	1.16e-10	negative
WDR4	AC080162.1	-0.202504	9.46e-06	negative
METTL1	AC100810.1	0.203739	8.32e-06	postive
METTL1	RAD51-AS1	-0.218614	1.67e-06	negative
WDR4	RAD51-AS1	-0.21016	4.22e-06	negative
METTL1	AC069281.2	0.231022	4e-07	postive
WDR4	AC005332.6	-0.296869	4.88e-11	negative
WDR4	AL157392.4	-0.206968	5.93e-06	negative
METTL1	AC135048.1	0.295052	6.48e-11	postive
METTL1	LINC01023	0.264067	5.91e-09	postive
WDR4	AC005899.6	-0.315095	2.57e-12	negative
METTL1	AC005005.3	0.296691	5.02e-11	postive
METTL1	AC108449.2	-0.235862	2.24e-07	negative
METTL1	LINC01234	0.213896	2.81e-06	postive
METTL1	AC106738.1	0.209711	4.43e-06	postive
METTL1	GAPLINC	0.260469	9.63e-09	postive
METTL1	NORAD	-0.32265	7.15e-13	negative
WDR4	NORAD	-0.230583	4.21e-07	negative
METTL1	AC010173.1	0.220188	1.4e-06	postive
METTL1	AC138696.2	0.361574	5.41e-16	postive
WDR4	AC138696.2	0.232115	3.51e-07	postive
METTL1	AC073896.2	0.379469	1.4e-17	postive
WDR4	ARRDC1-AS1	0.214932	2.51e-06	postive
METTL1	AC008554.1	-0.23062	4.19e-07	negative
METTL1	AC096564.1	0.200368	1.18e-05	postive
METTL1	AC011477.2	-0.255101	1.97e-08	negative
WDR4	AC011477.2	-0.217593	1.87e-06	negative
WDR4	AC004687.1	-0.220409	1.36e-06	negative
METTL1	AC099811.3	0.260678	9.36e-09	postive
WDR4	AC092747.4	-0.209051	4.75e-06	negative
METTL1	GLIS2-AS1	0.206249	6.4e-06	postive
METTL1	RARA-AS1	0.213195	3.04e-06	postive
METTL1	AP003469.2	0.220931	1.29e-06	postive
WDR4	AL118506.1	0.252244	2.86e-08	postive
WDR4	AL022341.1	0.208961	4.8e-06	postive
METTL1	POLR2J4	0.248432	4.68e-08	postive
METTL1	AC024075.1	-0.31022	5.77e-12	negative
METTL1	BX284668.4	0.24353	8.7e-08	postive
WDR4	AL604028.1	-0.282691	4.19e-10	negative
METTL1	CATIP-AS1	0.219324	1.54e-06	postive
METTL1	AC079921.2	-0.238382	1.65e-07	negative
METTL1	AP001527.2	0.206409	6.29e-06	postive
METTL1	AC092652.1	0.280699	5.62e-10	postive
METTL1	LNCTAM34A	0.249694	3.98e-08	postive
METTL1	LINC01816	0.246559	5.94e-08	postive
WDR4	LINC01816	0.265811	4.65e-09	postive
METTL1	AC009065.4	0.20861	4.98e-06	postive
METTL1	AC005076.1	0.28926	1.57e-10	postive
WDR4	LINC01301	0.255552	1.85e-08	postive
METTL1	AC005104.1	-0.237434	1.85e-07	negative
METTL1	AL161452.1	0.251459	3.17e-08	postive
WDR4	AL161452.1	0.219875	1.45e-06	postive
WDR4	AC019131.2	-0.204121	8e-06	negative
METTL1	AC083880.1	0.294272	7.3e-11	postive
METTL1	AL122035.1	-0.217132	1.97e-06	negative
METTL1	ZBTB11-AS1	0.287844	1.95e-10	postive
WDR4	AC010336.2	0.205536	6.89e-06	postive
METTL1	AP002360.1	0.284437	3.24e-10	postive
METTL1	AL353622.1	-0.222712	1.05e-06	negative
WDR4	AL353622.1	-0.243548	8.68e-08	negative
METTL1	AC084018.1	-0.259902	1.04e-08	negative
METTL1	AC099343.2	-0.203467	8.56e-06	negative
WDR4	AC099343.2	-0.241282	1.15e-07	negative
METTL1	AC009486.1	-0.212704	3.2e-06	negative
METTL1	AC023510.2	-0.260227	9.95e-09	negative
WDR4	AC023510.2	-0.206835	6.01e-06	negative
WDR4	TMCC1-AS1	0.235724	2.28e-07	postive
WDR4	MIR22HG	-0.288417	1.78e-10	negative
METTL1	ANKRD10-IT1	-0.259242	1.14e-08	negative
METTL1	AC009118.2	0.278497	7.74e-10	postive
WDR4	AC009118.2	0.229659	4.69e-07	postive
METTL1	PCOTH	0.261279	8.63e-09	postive
WDR4	PCOTH	0.302533	2e-11	postive
METTL1	SNHG25	0.264416	5.63e-09	postive
METTL1	AL158163.1	-0.261228	8.69e-09	negative
WDR4	AL158163.1	-0.267547	3.66e-09	negative
METTL1	AL118558.3	0.255717	1.81e-08	postive
METTL1	AC097359.2	0.292241	9.98e-11	postive
WDR4	AC097359.2	0.217485	1.89e-06	postive
WDR4	SEMA3F-AS1	-0.214694	2.58e-06	negative
WDR4	AC084876.1	-0.238849	1.55e-07	negative
METTL1	AC022210.1	0.271255	2.18e-09	postive
WDR4	AC022210.1	0.267539	3.66e-09	postive
METTL1	AC015911.8	-0.30194	2.2e-11	negative
WDR4	AC015911.8	-0.264187	5.81e-09	negative
METTL1	AC068338.2	0.263252	6.6e-09	postive
WDR4	AC125807.2	0.217734	1.84e-06	postive
METTL1	AL031055.1	0.393789	6.39e-19	postive
METTL1	AC005785.1	0.317693	1.66e-12	postive
WDR4	TUBA3FP	0.214651	2.59e-06	postive
METTL1	AC097468.3	0.276614	1.02e-09	postive
METTL1	AC016065.1	0.295916	5.66e-11	postive
METTL1	STARD7-AS1	0.201954	1e-05	postive
WDR4	STARD7-AS1	0.304381	1.49e-11	postive
METTL1	ZBED5-AS1	0.23653	2.06e-07	postive
WDR4	KTN1-AS1	0.212792	3.17e-06	postive
WDR4	LINC02035	-0.274169	1.44e-09	negative
METTL1	LINC00324	-0.211146	3.79e-06	negative
WDR4	LINC00324	-0.282314	4.43e-10	negative
METTL1	AC002116.2	0.237401	1.86e-07	postive
WDR4	AC002116.2	0.326015	4e-13	postive
WDR4	AC018755.4	-0.203249	8.76e-06	negative
METTL1	ALG13-AS1	-0.256301	1.68e-08	negative
METTL1	ELOA-AS1	0.201021	1.1e-05	postive
METTL1	LINC01772	-0.276176	1.08e-09	negative
WDR4	LINC01772	-0.205798	6.71e-06	negative
WDR4	AC116407.2	-0.232569	3.32e-07	negative
METTL1	AC007292.2	0.220797	1.31e-06	postive
WDR4	AC007292.2	0.202054	9.91e-06	postive
METTL1	AC015917.2	0.249822	3.91e-08	postive
METTL1	AL162377.1	0.224642	8.42e-07	postive
METTL1	AC078883.1	-0.215357	2.4e-06	negative
WDR4	AC078883.1	-0.201896	1.01e-05	negative
METTL1	AL122035.2	-0.237369	1.86e-07	negative
WDR4	AL122035.2	-0.231778	3.65e-07	negative
METTL1	BTG3-AS1	0.237381	1.86e-07	postive
WDR4	BTG3-AS1	0.260423	9.69e-09	postive
METTL1	SNHG11	0.279669	6.53e-10	postive
METTL1	AC092718.4	0.294723	6.81e-11	postive
METTL1	AL671710.1	0.256452	1.65e-08	postive
WDR4	AL671710.1	0.203507	8.53e-06	postive
METTL1	AC106820.3	0.227633	5.95e-07	postive
METTL1	LINC01443	0.218827	1.63e-06	postive
METTL1	AC073046.1	-0.286535	2.37e-10	negative
WDR4	RHPN1-AS1	0.267626	3.62e-09	postive
METTL1	LINC01237	-0.220768	1.31e-06	negative
METTL1	AL162586.1	-0.209867	4.35e-06	negative
METTL1	AC073896.4	0.273996	1.48e-09	postive
METTL1	AC025165.5	0.621376	1.2e-51	postive
METTL1	AL360270.3	0.238273	1.67e-07	postive
WDR4	AC005899.7	-0.229145	4.99e-07	negative
METTL1	AC007878.1	-0.212648	3.22e-06	negative
METTL1	EBLN3P	-0.315256	2.5e-12	negative
WDR4	EBLN3P	-0.201549	1.04e-05	negative
WDR4	LINC01775	0.30042	2.8e-11	postive
METTL1	UBE2D3-AS1	0.238479	1.63e-07	postive
METTL1	SLC12A9-AS1	0.281578	4.94e-10	postive
WDR4	SLC12A9-AS1	0.326538	3.65e-13	postive
METTL1	CERNA1	-0.227513	6.04e-07	negative
WDR4	CERNA1	-0.319765	1.17e-12	negative
METTL1	AC092115.3	0.23523	2.42e-07	postive
METTL1	AC002398.1	0.367433	1.68e-16	postive
METTL1	AP4B1-AS1	-0.239066	1.51e-07	negative
METTL1	AC027228.2	0.264374	5.67e-09	postive
WDR4	AC027228.2	0.294442	7.11e-11	postive
METTL1	AC018529.2	0.214334	2.68e-06	postive
METTL1	AL390728.4	-0.282652	4.22e-10	negative
WDR4	AL390728.4	-0.242938	9.37e-08	negative
WDR4	SNHG3	0.20486	7.4e-06	postive
METTL1	TYMSOS	0.246283	6.15e-08	postive
WDR4	TYMSOS	0.266919	3.99e-09	postive
METTL1	AC006504.5	0.279278	6.91e-10	postive
WDR4	AC006504.5	0.301225	2.46e-11	postive
WDR4	AP003486.1	-0.241702	1.09e-07	negative
METTL1	LINC01607	0.299986	2.99e-11	postive
METTL1	AC023983.2	0.285164	2.91e-10	postive
WDR4	AC023983.2	0.224813	8.25e-07	postive
WDR4	AC010226.1	-0.220608	1.33e-06	negative
METTL1	AC008035.1	0.277614	8.8e-10	postive
METTL1	AC100830.2	-0.219666	1.48e-06	negative
METTL1	AC002470.1	0.254802	2.05e-08	postive
WDR4	AC002470.1	0.201106	1.09e-05	postive
WDR4	AC024575.1	0.244517	7.69e-08	postive
METTL1	ATP2A1-AS1	0.368909	1.24e-16	postive
WDR4	ATP2A1-AS1	0.322026	7.96e-13	postive
METTL1	AC010834.3	-0.245397	6.88e-08	negative
METTL1	LINC00861	-0.26043	9.68e-09	negative
WDR4	LINC00861	-0.240703	1.24e-07	negative
METTL1	AC253536.3	-0.220653	1.33e-06	negative
WDR4	AC009133.1	0.20913	4.71e-06	postive
METTL1	AC005332.7	-0.208245	5.18e-06	negative
WDR4	AC005332.7	-0.236411	2.09e-07	negative
METTL1	AL157904.1	0.205604	6.85e-06	postive
METTL1	AC100791.3	0.258448	1.26e-08	postive
METTL1	AC007728.2	-0.22134	1.23e-06	negative
WDR4	AC007728.2	-0.221075	1.26e-06	negative
METTL1	MAP4K3-DT	0.245075	7.17e-08	postive
METTL1	AC009950.1	-0.246171	6.24e-08	negative
METTL1	PSMD6-AS2	-0.29491	6.62e-11	negative
METTL1	AL034376.1	0.221644	1.19e-06	postive
METTL1	HOXD-AS2	0.339947	3.32e-14	postive
METTL1	AL451085.2	0.205899	6.64e-06	postive
METTL1	AL133371.2	-0.260549	9.53e-09	negative
WDR4	AL133371.2	-0.265183	5.07e-09	negative
METTL1	ZNF561-AS1	0.237214	1.9e-07	postive
METTL1	LINC00337	0.283506	3.72e-10	postive
METTL1	TMEM202-AS1	0.241986	1.06e-07	postive
WDR4	AC009318.4	-0.256183	1.71e-08	negative
METTL1	AC008105.2	0.212893	3.14e-06	postive
METTL1	HEXA-AS1	0.228662	5.28e-07	postive
WDR4	HEXA-AS1	0.206183	6.44e-06	postive
METTL1	AC007038.1	-0.238877	1.55e-07	negative
METTL1	AC156455.1	0.231233	3.9e-07	postive
METTL1	LINC01588	0.266173	4.43e-09	postive
METTL1	AL590617.2	0.307632	8.8e-12	postive
METTL1	AL132989.1	-0.274318	1.41e-09	negative
METTL1	AC090589.3	-0.205629	6.83e-06	negative
WDR4	AC090589.3	-0.233324	3.04e-07	negative
METTL1	AL035541.1	0.2387	1.58e-07	postive
WDR4	AC115837.1	0.206494	6.23e-06	postive
METTL1	PSPC1-AS2	-0.256349	1.67e-08	negative
WDR4	ARHGAP27P1-BPTFP1-KPNA2P3	-0.27543	1.2e-09	negative
METTL1	AC018752.1	-0.316359	2.08e-12	negative
METTL1	AC131009.3	0.359147	8.72e-16	postive
WDR4	AC131009.3	0.326989	3.37e-13	postive
METTL1	B4GALT1-AS1	0.213757	2.86e-06	postive
WDR4	AC005261.2	0.248809	4.46e-08	postive
METTL1	AL132780.1	-0.249728	3.96e-08	negative
METTL1	AC010680.4	-0.224148	8.91e-07	negative
METTL1	NRAV	0.299065	3.46e-11	postive
METTL1	AC008915.2	0.360192	7.1e-16	postive
WDR4	AC008915.2	0.33434	9.17e-14	postive
METTL1	AC013468.1	-0.228838	5.17e-07	negative
METTL1	OIP5-AS1	-0.305106	1.32e-11	negative
WDR4	OIP5-AS1	-0.206725	6.08e-06	negative
WDR4	GAS5-AS1	-0.216842	2.03e-06	negative
WDR4	MIR155HG	-0.231346	3.84e-07	negative
WDR4	SNHG19	0.241449	1.13e-07	postive
METTL1	AC027319.1	0.250483	3.59e-08	postive
METTL1	AC008969.1	-0.221422	1.22e-06	negative
METTL1	RFX3-AS1	-0.290634	1.28e-10	negative
METTL1	AP000695.2	0.248542	4.61e-08	postive
METTL1	AC018413.1	0.217868	1.81e-06	postive
WDR4	AC018413.1	0.213631	2.89e-06	postive
WDR4	AC025175.1	-0.229936	4.54e-07	negative
METTL1	AC109322.1	0.378373	1.77e-17	postive
WDR4	AC109322.1	0.324829	4.91e-13	postive
METTL1	UBAC2-AS1	0.269932	2.62e-09	postive
WDR4	UBAC2-AS1	0.331125	1.63e-13	postive
METTL1	NDUFB2-AS1	0.430325	1.18e-22	postive
WDR4	NDUFB2-AS1	0.334422	9.04e-14	postive
METTL1	AL023881.1	0.227569	6e-07	postive
METTL1	SEC62-AS1	-0.205242	7.11e-06	negative
METTL1	BX284668.5	0.218724	1.65e-06	postive
METTL1	AC025917.1	-0.32915	2.31e-13	negative
WDR4	AC025917.1	-0.238959	1.53e-07	negative
WDR4	RNASEH1-AS1	0.235019	2.48e-07	postive
METTL1	AC108488.1	0.291384	1.14e-10	postive
METTL1	AC015911.3	-0.286584	2.35e-10	negative
WDR4	AC015911.3	-0.257775	1.38e-08	negative
WDR4	AC139887.4	-0.2316	3.73e-07	negative
METTL1	AC106782.5	-0.200447	1.17e-05	negative
METTL1	AC008736.2	0.331926	1.41e-13	postive
METTL1	AL049840.5	-0.261269	8.64e-09	negative
METTL1	Z68871.1	-0.253117	2.55e-08	negative
METTL1	AL121832.2	0.350765	4.41e-15	postive
WDR4	AL121832.2	0.270269	2.5e-09	postive
METTL1	AC027682.6	0.258052	1.33e-08	postive
METTL1	HOXA11-AS	0.224964	8.11e-07	postive
WDR4	OCIAD1-AS1	-0.23657	2.05e-07	negative
METTL1	LINC01971	0.292414	9.72e-11	postive
WDR4	LINC01971	0.212915	3.13e-06	postive
WDR4	AC093752.1	-0.230063	4.48e-07	negative
METTL1	AC005229.4	0.348179	7.19e-15	postive
METTL1	AC145423.2	0.336308	6.44e-14	postive
WDR4	PARD6G-AS1	0.200293	1.19e-05	postive
METTL1	AC073508.3	0.202885	9.09e-06	postive
WDR4	LINC01480	-0.202155	9.81e-06	negative
METTL1	LINC01637	0.275874	1.13e-09	postive
METTL1	AC112491.1	0.216616	2.08e-06	postive
WDR4	AC112491.1	0.22919	4.96e-07	postive
METTL1	AC011477.3	-0.227622	5.96e-07	negative
METTL1	AC135050.1	0.264712	5.41e-09	postive
WDR4	AC135050.1	0.206275	6.38e-06	postive
WDR4	AL355803.1	0.221378	1.22e-06	postive
WDR4	AC083799.1	-0.305212	1.3e-11	negative
WDR4	UBL7-AS1	0.21974	1.47e-06	postive
WDR4	FAM222A-AS1	0.258423	1.27e-08	postive
WDR4	AC127502.2	-0.209628	4.47e-06	negative
METTL1	RBPMS-AS1	0.207158	5.81e-06	postive
WDR4	LINC00638	0.228888	5.14e-07	postive
WDR4	LINC00342	-0.264194	5.81e-09	negative
METTL1	CR936218.1	-0.23305	3.14e-07	negative
WDR4	LINC00205	0.237484	1.84e-07	postive
METTL1	SNHG9	0.30096	2.57e-11	postive
METTL1	AC010733.1	-0.305758	1.19e-11	negative
METTL1	AC107032.2	0.215966	2.24e-06	postive
METTL1	FAM13A-AS1	-0.206703	6.1e-06	negative
WDR4	FAM13A-AS1	-0.294801	6.73e-11	negative
METTL1	AL683807.1	-0.251602	3.11e-08	negative
WDR4	AL683807.1	-0.218185	1.75e-06	negative
METTL1	AL122023.1	0.287076	2.18e-10	postive
METTL1	LINC01126	-0.215992	2.23e-06	negative
METTL1	AC104938.1	-0.204786	7.46e-06	negative
WDR4	AL590369.1	0.208279	5.16e-06	postive
METTL1	LINC00926	-0.220225	1.39e-06	negative
WDR4	AC021092.1	0.2293	4.9e-07	postive
METTL1	AC084125.4	0.232305	3.43e-07	postive
WDR4	AC084125.4	0.3074	9.14e-12	postive
METTL1	AP001453.2	0.254367	2.17e-08	postive
METTL1	AL591895.1	-0.218899	1.62e-06	negative
WDR4	AL591895.1	-0.280086	6.14e-10	negative
WDR4	AC093726.2	-0.258413	1.27e-08	negative
WDR4	AL391834.2	-0.24298	9.32e-08	negative
METTL1	HAGLROS	0.268056	3.41e-09	postive
METTL1	AC008770.3	-0.248849	4.43e-08	negative
METTL1	AC012645.3	-0.209385	4.58e-06	negative
METTL1	AC020659.1	-0.252306	2.84e-08	negative
WDR4	AC020659.1	-0.231042	3.99e-07	negative
METTL1	AC092953.2	-0.227946	5.74e-07	negative
WDR4	AC092953.2	-0.245455	6.83e-08	negative
METTL1	RHOA-IT1	-0.207108	5.84e-06	negative
METTL1	AC092802.2	-0.241583	1.11e-07	negative
WDR4	AC012557.2	-0.201062	1.1e-05	negative
WDR4	AC125257.1	-0.280953	5.41e-10	negative
METTL1	AGAP2-AS1	0.635994	9.4e-55	postive
WDR4	Z93930.2	0.209542	4.51e-06	postive
METTL1	AC092287.1	0.254518	2.12e-08	postive
METTL1	RNF216P1	0.33563	7.28e-14	postive
WDR4	RNF216P1	0.216334	2.15e-06	postive
WDR4	AC121761.2	-0.279592	6.6e-10	negative
METTL1	AC022784.1	0.213057	3.08e-06	postive
METTL1	AP001922.5	0.202042	9.92e-06	postive
WDR4	AC120053.1	-0.211051	3.83e-06	negative
METTL1	FOXN3-AS1	0.304581	1.44e-11	postive
METTL1	BX537318.1	0.20835	5.12e-06	postive
METTL1	MANEA-DT	-0.26427	5.75e-09	negative
METTL1	EPHA5-AS1	0.264191	5.81e-09	postive
METTL1	AC008074.2	-0.205477	6.94e-06	negative
WDR4	AC108134.3	-0.258067	1.33e-08	negative
WDR4	AC012073.1	0.233815	2.86e-07	postive
WDR4	PSMB8-AS1	-0.30857	7.56e-12	negative
WDR4	LINC02328	-0.256026	1.74e-08	negative
METTL1	AC015912.3	0.332692	1.23e-13	postive
WDR4	AC015912.3	0.202115	9.85e-06	postive
METTL1	ZNF436-AS1	-0.203538	8.5e-06	negative
METTL1	AC026471.1	0.252834	2.65e-08	postive
WDR4	AC026471.1	0.234258	2.72e-07	postive
METTL1	AL121944.1	0.233686	2.91e-07	postive
METTL1	AC116025.2	0.309471	6.52e-12	postive
WDR4	AC116025.2	0.274293	1.42e-09	postive
WDR4	AC012313.1	0.317133	1.83e-12	postive
METTL1	TONSL-AS1	0.253583	2.4e-08	postive
WDR4	AL158206.1	-0.203053	8.94e-06	negative
METTL1	AC110285.5	0.217629	1.86e-06	postive
METTL1	AC135178.5	0.202404	9.56e-06	postive
METTL1	AC023813.3	0.282449	4.35e-10	postive
WDR4	AC090948.3	-0.209916	4.33e-06	negative
METTL1	ATXN2-AS	0.300344	2.83e-11	postive
METTL1	AC005696.4	0.201232	1.08e-05	postive
METTL1	AL139289.2	0.215333	2.4e-06	postive
METTL1	AC243964.3	0.262756	7.07e-09	postive
WDR4	AC243964.3	0.25654	1.63e-08	postive
METTL1	AC091185.1	-0.27312	1.67e-09	negative
WDR4	AC091185.1	-0.224126	8.93e-07	negative
WDR4	AC012181.1	-0.226409	6.86e-07	negative
METTL1	RERE-AS1	-0.201823	1.02e-05	negative
WDR4	RERE-AS1	-0.250245	3.71e-08	negative
METTL1	LIPE-AS1	0.359076	8.85e-16	postive
WDR4	LIPE-AS1	0.20872	4.92e-06	postive
METTL1	NPTN-IT1	-0.281407	5.06e-10	negative
METTL1	CHKB-DT	0.366996	1.83e-16	postive
WDR4	CHKB-DT	0.255201	1.94e-08	postive
METTL1	AL139407.1	-0.210119	4.24e-06	negative
WDR4	WAC-AS1	-0.231091	3.96e-07	negative
METTL1	PXN-AS1	0.306258	1.1e-11	postive
WDR4	PXN-AS1	0.217249	1.94e-06	postive
WDR4	AC010245.2	-0.20149	1.05e-05	negative
WDR4	ATP6V1B1-AS1	0.23172	3.68e-07	postive
METTL1	SLCO4A1-AS1	0.236242	2.14e-07	postive
METTL1	AP001437.1	0.234813	2.54e-07	postive
METTL1	LINC02609	0.212525	3.27e-06	postive
METTL1	AP000894.4	0.20941	4.57e-06	postive
WDR4	BHLHE40-AS1	-0.241999	1.05e-07	negative
METTL1	AC011445.1	0.220105	1.41e-06	postive
WDR4	AC011445.1	0.343891	1.6e-14	postive
METTL1	AC090114.2	0.200595	1.15e-05	postive
METTL1	AC064836.3	0.224406	8.65e-07	postive
METTL1	AP003390.1	0.214538	2.62e-06	postive
METTL1	AC239868.1	-0.226117	7.1e-07	negative
METTL1	AL138781.1	0.265695	4.73e-09	postive
METTL1	AC103858.1	-0.247884	5.02e-08	negative
WDR4	AC103858.1	-0.205775	6.72e-06	negative
METTL1	AC021078.1	-0.262167	7.65e-09	negative
METTL1	LINC00539	-0.22346	9.64e-07	negative
METTL1	AC079610.2	-0.209851	4.36e-06	negative
WDR4	OGFRP1	0.253739	2.35e-08	postive
METTL1	AL138966.2	0.277345	9.15e-10	postive
WDR4	AL138966.2	0.271567	2.09e-09	postive
METTL1	HCP5	-0.209035	4.76e-06	negative
WDR4	HCP5	-0.261478	8.4e-09	negative
METTL1	AL023803.2	0.235186	2.43e-07	postive
WDR4	AL023803.2	0.286137	2.51e-10	postive
METTL1	SNAI3-AS1	0.213835	2.83e-06	postive
WDR4	SNAI3-AS1	0.217885	1.81e-06	postive
METTL1	MIR4453HG	-0.21252	3.27e-06	negative
METTL1	AC109460.2	-0.213204	3.03e-06	negative
METTL1	AC026979.2	0.304976	1.35e-11	postive
METTL1	AC011446.1	0.286629	2.34e-10	postive
WDR4	AC009283.1	-0.248832	4.44e-08	negative
METTL1	AC022558.1	-0.203394	8.63e-06	negative
METTL1	VPS9D1-AS1	0.317989	1.58e-12	postive
WDR4	VPS9D1-AS1	0.38032	1.17e-17	postive
WDR4	AC004471.1	0.267612	3.63e-09	postive
WDR4	AL049552.1	-0.245476	6.81e-08	negative
METTL1	SLC12A5-AS1	0.231978	3.57e-07	postive
METTL1	AC067852.2	0.216654	2.08e-06	postive
WDR4	AC067852.2	0.323254	6.44e-13	postive
METTL1	AL118522.1	0.239808	1.38e-07	postive
WDR4	IPO9-AS1	0.201115	1.09e-05	postive
WDR4	AC008592.3	-0.202723	9.25e-06	negative
METTL1	JARID2-AS1	0.255448	1.88e-08	postive
WDR4	AC010542.5	-0.245753	6.58e-08	negative
METTL1	AC005261.3	0.209294	4.63e-06	postive
WDR4	AC005083.1	-0.230193	4.41e-07	negative
WDR4	AC025171.4	-0.214896	2.52e-06	negative
METTL1	GIHCG	0.65107	3.89e-58	postive
WDR4	PSMA3-AS1	-0.212212	3.38e-06	negative
METTL1	AC007611.1	0.210069	4.26e-06	postive
METTL1	AL391422.4	0.240998	1.19e-07	postive
METTL1	PCAT6	0.329902	2.02e-13	postive
METTL1	AC009902.2	0.358818	9.3e-16	postive
WDR4	AC009902.2	0.254491	2.13e-08	postive
WDR4	AL359076.1	-0.233728	2.89e-07	negative
WDR4	GNAS-AS1	0.29464	6.9e-11	postive
METTL1	AC027644.3	0.381713	8.73e-18	postive
METTL1	AC007663.3	0.250089	3.78e-08	postive
METTL1	LINC01909	0.211801	3.53e-06	postive
METTL1	MIAT	-0.227954	5.73e-07	negative
WDR4	MIAT	-0.241741	1.09e-07	negative
METTL1	LINC01948	-0.213194	3.04e-06	negative
METTL1	PAXIP1-AS2	-0.297073	4.73e-11	negative
WDR4	PAXIP1-AS2	-0.27532	1.22e-09	negative
WDR4	AC004771.1	-0.209631	4.46e-06	negative
METTL1	AL118516.1	0.200245	1.19e-05	postive
METTL1	AC113194.1	0.224768	8.3e-07	postive
WDR4	AC011676.1	0.25107	3.33e-08	postive
METTL1	AC138956.2	-0.244144	8.06e-08	negative
METTL1	AP000692.2	0.251928	2.98e-08	postive
METTL1	AC018553.1	0.240759	1.23e-07	postive
METTL1	PRR34-AS1	0.305242	1.3e-11	postive
METTL1	C1orf220	-0.224299	8.76e-07	negative
METTL1	VIM-AS1	-0.222785	1.04e-06	negative
WDR4	VIM-AS1	-0.230273	4.37e-07	negative
METTL1	AC007773.1	0.27984	6.37e-10	postive
WDR4	AC007773.1	0.249309	4.18e-08	postive
WDR4	AL161729.1	0.203195	8.81e-06	postive
WDR4	LY6E-DT	0.200623	1.15e-05	postive
WDR4	AC084036.1	-0.215102	2.46e-06	negative
METTL1	AC005330.1	0.200777	1.13e-05	postive
METTL1	AC003070.1	-0.215385	2.39e-06	negative
WDR4	AC003070.1	-0.259448	1.1e-08	negative
METTL1	YTHDF3-AS1	0.316152	2.16e-12	postive
WDR4	YTHDF3-AS1	0.230559	4.22e-07	postive
METTL1	AL021392.1	0.248889	4.41e-08	postive
METTL1	AC007066.2	-0.204069	8.04e-06	negative
METTL1	AC025287.3	-0.215012	2.49e-06	negative
METTL1	AC010973.2	0.222112	1.12e-06	postive
METTL1	AC005498.2	0.219746	1.47e-06	postive
WDR4	AL031775.2	-0.247376	5.35e-08	negative
WDR4	AC002553.1	-0.253965	2.28e-08	negative
METTL1	AC011825.2	-0.216322	2.15e-06	negative
WDR4	AC131235.2	0.203447	8.58e-06	postive
METTL1	AC127496.5	0.271348	2.15e-09	postive
METTL1	AC022400.1	-0.211625	3.6e-06	negative
METTL1	FGD5-AS1	-0.33599	6.82e-14	negative
WDR4	FGD5-AS1	-0.302358	2.06e-11	negative
WDR4	AC015726.1	-0.269205	2.91e-09	negative
METTL1	ZNF687-AS1	0.264299	5.72e-09	postive
METTL1	UPK1A-AS1	0.233434	3e-07	postive
METTL1	MALAT1	-0.213752	2.86e-06	negative
WDR4	MALAT1	-0.318984	1.34e-12	negative
METTL1	EXOSC10-AS1	0.264113	5.87e-09	postive
METTL1	AC096586.2	-0.206148	6.46e-06	negative
WDR4	AC096586.2	-0.225265	7.83e-07	negative
METTL1	AC004221.1	0.222693	1.05e-06	postive
WDR4	AC004221.1	0.2693	2.87e-09	postive
METTL1	AP000704.1	0.222399	1.09e-06	postive
WDR4	AP000704.1	0.22926	4.92e-07	postive
METTL1	AC040169.1	0.353863	2.43e-15	postive
WDR4	AC040169.1	0.202411	9.55e-06	postive
WDR4	AC124045.1	-0.259479	1.1e-08	negative
METTL1	AC004908.1	-0.220637	1.33e-06	negative
METTL1	DGCR5	0.266192	4.41e-09	postive
WDR4	AC016957.2	-0.268244	3.32e-09	negative
WDR4	AL355312.3	0.209999	4.29e-06	postive
METTL1	MALINC1	-0.233959	2.81e-07	negative
METTL1	LINC00323	0.200733	1.14e-05	postive
WDR4	AL390208.1	-0.266665	4.13e-09	negative
METTL1	AC243960.1	-0.259727	1.06e-08	negative
WDR4	AC243960.1	-0.243796	8.41e-08	negative
METTL1	PRKAG2-AS1	0.248281	4.77e-08	postive
WDR4	AL732314.6	0.326502	3.67e-13	postive
METTL1	IER3-AS1	0.319317	1.26e-12	postive
METTL1	Z83843.1	-0.248632	4.56e-08	negative
WDR4	Z83843.1	-0.220349	1.37e-06	negative
METTL1	LINC01703	0.254977	2e-08	postive
WDR4	LINC01703	0.239383	1.46e-07	postive
METTL1	SUCLA2-AS1	0.275467	1.2e-09	postive
WDR4	SUCLA2-AS1	0.287362	2.09e-10	postive
METTL1	AC023509.3	0.263071	6.77e-09	postive
WDR4	AC011451.1	-0.268869	3.04e-09	negative
METTL1	C1RL-AS1	-0.266683	4.12e-09	negative
METTL1	LINC01502	0.217237	1.95e-06	postive
METTL1	AC242426.2	-0.212529	3.26e-06	negative
METTL1	AL137003.1	-0.209037	4.76e-06	negative
METTL1	AC002467.1	0.305005	1.35e-11	postive
METTL1	AC138207.2	0.206173	6.45e-06	postive
WDR4	SLC5A4-AS1	0.200478	1.17e-05	postive
METTL1	AC234775.3	-0.266454	4.26e-09	negative
METTL1	AC092119.3	0.220161	1.4e-06	postive
METTL1	AL662844.4	-0.208169	5.22e-06	negative
WDR4	AL662844.4	-0.239504	1.43e-07	negative
METTL1	AC232271.1	-0.21592	2.25e-06	negative
METTL1	AC130343.2	0.264519	5.55e-09	postive
WDR4	AC074212.1	0.231099	3.96e-07	postive
METTL1	AL080317.2	0.206179	6.44e-06	postive
WDR4	LINC01547	0.261851	7.99e-09	postive
METTL1	ARF4-AS1	0.228248	5.54e-07	postive
METTL1	AC133552.5	0.296702	5.01e-11	postive
METTL1	AC068025.1	0.202827	9.15e-06	postive
WDR4	AC068025.1	0.268126	3.38e-09	postive
METTL1	AC008764.2	-0.294381	7.18e-11	negative
METTL1	AC009570.1	0.290191	1.36e-10	postive
METTL1	THAP7-AS1	0.230608	4.2e-07	postive
WDR4	THAP7-AS1	0.248218	4.81e-08	postive
METTL1	AC025165.4	0.465123	1.17e-26	postive
WDR4	LINC01094	-0.221251	1.24e-06	negative
METTL1	LINC01679	0.296339	5.3e-11	postive
WDR4	LINC01679	0.25969	1.07e-08	postive
METTL1	AC016876.2	0.333817	1.01e-13	postive
WDR4	HLA-DQB1-AS1	-0.270173	2.54e-09	negative
METTL1	AC046143.2	0.209365	4.59e-06	postive
METTL1	AC016876.3	0.248562	4.6e-08	postive
METTL1	AC090515.2	0.281969	4.66e-10	postive
WDR4	DDX11-AS1	0.248379	4.71e-08	postive
WDR4	LINC02289	0.212279	3.35e-06	postive
METTL1	AC009120.3	-0.253564	2.41e-08	negative
METTL1	AATBC	0.284265	3.32e-10	postive
METTL1	AC012676.1	0.28521	2.89e-10	postive
WDR4	AC012676.1	0.305344	1.27e-11	postive
METTL1	AL121820.2	0.216783	2.05e-06	postive
METTL1	AC020558.1	0.24899	4.35e-08	postive
METTL1	AL157838.1	-0.235705	2.28e-07	negative
METTL1	AC084357.2	0.233005	3.16e-07	postive
WDR4	ITGB2-AS1	-0.246512	5.97e-08	negative
METTL1	AL121899.1	0.239424	1.45e-07	postive
METTL1	AC007014.2	0.246369	6.08e-08	postive
METTL1	PPP3CB-AS1	-0.268691	3.12e-09	negative
WDR4	PPP3CB-AS1	-0.23826	1.67e-07	negative
METTL1	FOXP4-AS1	0.227231	6.24e-07	postive
WDR4	FOXP4-AS1	0.369149	1.19e-16	postive
WDR4	AC005840.4	-0.203103	8.89e-06	negative
METTL1	PITPNA-AS1	0.206862	6e-06	postive
METTL1	AC093110.1	-0.20389	8.19e-06	negative
METTL1	AC005696.1	0.226854	6.52e-07	postive
METTL1	FMR1-IT1	-0.20788	5.38e-06	negative
METTL1	AL159166.1	0.253859	2.32e-08	postive
METTL1	AC090559.1	-0.272854	1.74e-09	negative
WDR4	AC090559.1	-0.207238	5.76e-06	negative
WDR4	USP2-AS1	0.388616	1.98e-18	postive
WDR4	LINC01311	0.204603	7.6e-06	postive
METTL1	AL136162.1	0.215493	2.36e-06	postive
METTL1	PVT1	0.283906	3.5e-10	postive
WDR4	PVT1	0.308125	8.12e-12	postive
METTL1	AL096828.3	0.257886	1.36e-08	postive
METTL1	AL365361.1	-0.310832	5.22e-12	negative
WDR4	AL365361.1	-0.286595	2.35e-10	negative
METTL1	AC091563.1	-0.259919	1.04e-08	negative
METTL1	AC010654.1	0.248311	4.75e-08	postive
METTL1	NOP14-AS1	0.253961	2.29e-08	postive
METTL1	AC015849.3	-0.24197	1.06e-07	negative
METTL1	AC006058.3	0.217431	1.9e-06	postive
WDR4	AC006058.3	0.220237	1.39e-06	postive
WDR4	MCM3AP-AS1	0.20997	4.3e-06	postive
METTL1	AC089999.2	0.229924	4.55e-07	postive
WDR4	AL159169.2	-0.215213	2.43e-06	negative
METTL1	AC007387.1	0.2428	9.53e-08	postive
WDR4	AC007387.1	0.25019	3.73e-08	postive
METTL1	AP003119.2	0.315102	2.57e-12	postive
METTL1	AC115618.1	0.227001	6.41e-07	postive
WDR4	AC009299.2	0.206987	5.92e-06	postive
METTL1	CARD8-AS1	-0.277556	8.87e-10	negative
METTL1	AL355075.2	-0.256422	1.65e-08	negative
WDR4	AC004982.1	-0.201316	1.07e-05	negative
WDR4	HDHD5-AS1	0.208949	4.8e-06	postive
WDR4	AC245884.9	0.211753	3.55e-06	postive
WDR4	LINC01176	-0.285713	2.68e-10	negative
METTL1	AP003392.1	-0.362813	4.23e-16	negative
METTL1	AC098487.1	0.212838	3.16e-06	postive
METTL1	AC005911.1	0.24489	7.33e-08	postive
METTL1	AC012184.3	0.246337	6.11e-08	postive
WDR4	AL135818.1	-0.210719	3.97e-06	negative
METTL1	AC025171.5	-0.228276	5.52e-07	negative
METTL1	AC010536.1	0.225495	7.63e-07	postive
WDR4	AC010536.1	0.261573	8.3e-09	postive
METTL1	AC008622.2	0.292029	1.03e-10	postive
WDR4	AC008622.2	0.275729	1.15e-09	postive
METTL1	AP003068.1	0.248237	4.8e-08	postive
WDR4	AP003068.1	0.217421	1.91e-06	postive
METTL1	AC127521.1	-0.20028	1.19e-05	negative
METTL1	AC009779.2	0.298209	3.96e-11	postive
METTL1	LINC00513	0.200518	1.16e-05	postive
METTL1	AL034346.1	0.224675	8.38e-07	postive
WDR4	AL034346.1	0.256043	1.74e-08	postive
METTL1	ACAP2-IT1	-0.222338	1.1e-06	negative
METTL1	AL118558.4	0.211115	3.81e-06	postive
WDR4	AL512791.1	-0.246844	5.73e-08	negative
METTL1	AL024507.2	0.269911	2.63e-09	postive
WDR4	AC005332.3	-0.369621	1.08e-16	negative
METTL1	AL354733.3	-0.240029	1.34e-07	negative
WDR4	AL022067.1	-0.228871	5.15e-07	negative
WDR4	UXT-AS1	0.24905	4.32e-08	postive
WDR4	LINC01806	-0.21779	1.83e-06	negative
WDR4	AC004067.1	-0.269434	2.81e-09	negative
WDR4	AC027117.1	-0.215455	2.37e-06	negative
METTL1	AL606534.1	-0.208487	5.04e-06	negative
METTL1	CCDC18-AS1	-0.22372	9.36e-07	negative
WDR4	CCDC18-AS1	-0.219313	1.54e-06	negative
WDR4	AC013403.2	-0.206343	6.33e-06	negative
METTL1	UBA6-AS1	0.217442	1.9e-06	postive
