# Supplementary material for: Identification of m7G-associated lncRNA prognostic signature for predicting the immune status in cutaneous melanoma
Source: Aging (Albany NY). 2022 Jun 29;14(12):5233–49. doi: 10.18632/aging.204151 (PMC9271298; doi:10.18632/aging.204151)
Supplement: Supplementary Table 2 [file aging-14-204151-s002.xlsx]

## Sheet: lncRNA.diff
Supplementary Table 2. The correlations between levels of these lncRNAs and m7G methylation genes.
lncRNA	ConMean	TreatMean	LogFC	P-value	FDR
AC087741.2	0.880884	1.93666	1.13655	8.74804e-68	1.95866e-67
AC006042.1	0.370653	0.976505	1.39756	2.20102e-55	4.1499e-55
AL023803.1	0.124302	0.648508	2.38327	2.57272e-122	1.09565e-121
LINC01275	0.131411	0.350185	1.41403	1.02298e-53	1.85415e-53
AC087276.1	0.0987992	0.615021	2.63807	1.49138e-130	7.56876e-130
AL121906.2	0.214218	0.744476	1.79715	1.4865e-104	5.11456e-104
AC079336.2	0.190622	0.722294	1.92187	1.7773e-72	4.22803e-72
AC090948.2	0.320984	0.800514	1.31843	1.11956e-94	3.4435e-94
AC124312.2	0.252401	0.648767	1.36198	6.40068e-39	9.81867e-39
AP005205.2	0.148763	0.492717	1.72775	4.24661e-36	6.41733e-36
AL161772.1	0.204005	0.816147	2.00023	1.68159e-97	5.36171e-97
AC022034.1	0.588468	1.24413	1.0801	2.78919e-15	3.47366e-15
C9orf147	0.151182	0.324848	1.10348	1.8663e-56	3.58542e-56
AP003392.4	0.545459	1.16481	1.09456	1.03102e-79	2.67187e-79
BRWD1-AS2	0.406281	0.833333	1.03642	3.39039e-62	6.99915e-62
LINC02019	1.7517	0.455536	-1.94312	4.18922e-170	5.79826e-169
PCBP1-AS1	4.03857	1.03663	-1.96195	9.2469e-196	1.12627e-193
AF127936.1	0.0393621	0.54215	3.78381	9.51345e-139	5.73633e-138
RASAL2-AS1	0.543749	1.24053	1.18995	1.55186e-93	4.65559e-93
AL359711.2	0.363065	0.763898	1.07315	8.22516e-82	2.20666e-81
PRRT3-AS1	0.875087	2.57949	1.55959	3.77231e-123	1.62932e-122
AL158163.2	0.866353	0.291113	-1.57338	2.01884e-125	9.10722e-125
MAFG-DT	0.994855	2.08445	1.06711	1.31519e-109	4.68393e-109
AC025287.2	0.255032	0.567225	1.15324	1.57077e-43	2.56461e-43
TFAP2A-AS1	0.72996	2.70585	1.89019	1.30376e-142	9.16628e-142
AC100786.1	0.282669	1.7188	2.60422	1.83854e-156	1.64658e-155
LINC00520	0.178598	2.31287	3.69489	5.79768e-113	2.15292e-112
PIK3CD-AS2	0.623875	3.9503	2.66263	5.31318e-191	2.15715e-189
AL117335.1	0.561396	1.40364	1.32208	4.95143e-80	1.29417e-79
AL645728.1	0.405877	1.14379	1.4947	3.29145e-88	9.49998e-88
AL391069.2	0.274487	1.92932	2.81328	4.9743e-190	1.89334e-188
AC091180.5	0.0589275	0.453457	2.94395	5.7995e-151	4.9745e-150
AC104083.1	0.675095	1.35448	1.00457	1.9741e-69	4.50273e-69
AL163051.1	0.360595	0.904453	1.32667	2.57936e-124	1.14659e-123
AC055720.2	0.011344	2.05846	7.5035	7.01296e-253	4.27089e-250
AC026803.1	0.231867	0.637591	1.45933	3.55897e-70	8.27257e-70
ZSCAN16-AS1	1.37654	2.98359	1.116	4.18504e-159	3.98233e-158
LINC02166	0.13966	0.697582	2.32045	1.54076e-145	1.1443e-144
AC104521.1	0.0863761	0.488231	2.49886	3.47447e-125	1.55585e-124
AL357079.1	0.439509	1.28421	1.54692	1.78528e-150	1.46924e-149
AC006566.1	0.208084	0.537514	1.36913	5.9062e-54	1.08014e-53
MIRLET7BHG	2.45257	0.651238	-1.91304	1.21265e-171	1.84626e-170
AL442663.3	0.189385	0.584609	1.62615	1.5548e-114	5.95517e-114
AC018653.3	1.44814	0.571048	-1.34252	2.81352e-124	1.24162e-123
AC025154.2	0.523786	0.230368	-1.18504	1.56382e-14	1.92787e-14
LINC01357	0.464941	1.07824	1.21356	2.76317e-47	4.68739e-47
AL355338.1	1.48275	3.10094	1.06443	1.54935e-166	1.74733e-165
MCCC1-AS1	1.16257	0.4103	-1.50256	6.99087e-126	3.20108e-125
TMPO-AS1	0.347903	1.29096	1.89168	2.25032e-148	1.73474e-147
SH3BP5-AS1	2.72507	1.33774	-1.0265	1.39769e-141	9.45772e-141
AC009120.2	2.91604	1.08587	-1.42516	9.5434e-186	2.42164e-184
AC098484.1	0.649637	1.66295	1.35604	8.0773e-178	1.49063e-176
AC009171.2	0.351006	1.04687	1.57651	8.85071e-84	2.43895e-83
AC080013.4	0.451301	1.38749	1.62032	4.81545e-158	4.37703e-157
IDH1-AS1	0.556213	1.12649	1.01812	1.13912e-57	2.21637e-57
LINC00896	0.139541	0.619714	2.15092	3.76789e-65	8.19516e-65
CR381653.1	1.51335	0.472129	-1.68049	1.30947e-142	9.16628e-142
PCED1B-AS1	0.702429	1.75767	1.32324	3.96826e-67	8.78789e-67
AL162457.2	0.375939	2.44099	2.69889	4.21328e-49	7.2688e-49
AC007448.3	0.173623	0.492976	1.50556	1.41447e-69	3.25061e-69
AL031846.2	0.935758	0.398594	-1.23122	8.11352e-102	2.71491e-101
AC135048.1	1.41432	0.432357	-1.70982	1.46059e-150	1.23541e-149
AC005005.3	0.319802	2.14752	2.74742	3.07865e-192	1.70445e-190
LINC01234	0.0561867	1.32365	4.55815	2.46568e-159	2.38349e-158
AC106738.1	0.246268	0.527335	1.09849	2.00649e-17	2.5834e-17
GAPLINC	0.650818	2.50066	1.94199	6.20707e-129	3.07326e-128
AC138696.2	0.884096	2.15994	1.28871	8.41231e-115	3.28404e-114
AC096564.1	0.0418405	0.53685	3.68155	1.82571e-89	5.29457e-89
AC004687.1	0.341333	1.14155	1.74174	4.87143e-64	1.023e-63
AC099811.3	0.0221582	0.869781	5.29474	4.61497e-227	1.40526e-224
GLIS2-AS1	0.315386	1.00067	1.66578	7.23901e-66	1.58013e-65
RARA-AS1	0.865883	1.96308	1.18088	3.19754e-141	2.11664e-140
AP003469.2	0.0749433	0.867893	3.53364	2.93233e-148	2.23223e-147
AL022341.1	0.210466	0.712146	1.75858	2.50884e-100	8.25884e-100
AL604028.1	0.996975	2.41054	1.27372	2.51197e-174	4.13457e-173
AC079921.2	0.286787	0.58711	1.03365	7.24358e-55	1.34903e-54
AC092652.1	0.0651603	0.616898	3.24297	4.37546e-23	6.00148e-23
LINC01816	0.238661	1.16975	2.29317	2.40041e-142	1.64253e-141
AC083880.1	0.484162	1.02171	1.07742	1.45962e-79	3.7349e-79
AL122035.1	0.710133	1.54869	1.12489	1.66378e-141	1.11345e-140
ZBTB11-AS1	0.749621	1.73959	1.21452	2.68294e-164	2.9177e-163
AC009486.1	0.0249642	0.734453	4.87874	2.48578e-193	1.54964e-191
AC023510.2	0.352159	0.173121	-1.02445	5.87157e-21	7.82447e-21
AC009118.2	0.591787	0.295636	-1.00126	8.05079e-67	1.77642e-66
PCOTH	2.16875	0.882229	-1.29764	2.24616e-102	7.59951e-102
AL158163.1	1.08882	0.334041	-1.70466	2.95889e-150	2.40262e-149
AL118558.3	0.968489	2.00635	1.05077	9.52325e-127	4.53099e-126
AC097359.2	1.02498	2.35804	1.20199	2.9999e-132	1.58864e-131
SEMA3F-AS1	1.3872	0.591063	-1.23079	1.51531e-150	1.26415e-149
AC084876.1	0.723909	0.328177	-1.14134	6.65886e-65	1.43803e-64
AC015911.8	0.140299	0.614648	2.13126	1.63011e-60	3.33133e-60
AC125807.2	0.846703	1.7203	1.02273	1.13432e-109	4.06355e-109
AC002116.2	0.26799	0.889865	1.73141	6.11908e-139	3.72652e-138
AC018755.4	0.200913	0.989546	2.3002	1.94701e-98	6.34078e-98
ALG13-AS1	0.030465	0.645701	4.40564	2.93813e-180	6.88202e-179
AC015917.2	0.197915	0.452806	1.19401	3.20104e-44	5.25453e-44
AC092718.4	1.25058	3.99736	1.67644	2.15263e-187	6.55475e-186
AC106820.3	0.48439	1.09994	1.18318	1.69858e-94	5.19815e-94
LINC01443	0.124092	2.61979	4.39996	4.68991e-98	1.51923e-97
RHPN1-AS1	0.192379	2.10788	3.45377	2.54456e-193	1.54964e-191
LINC01237	0.780361	0.301928	-1.36994	7.17237e-94	2.16236e-93
AC073896.4	1.3978	3.49408	1.32175	1.15041e-194	1.00086e-192
AL360270.3	0.196359	0.43514	1.14799	1.97279e-62	4.10044e-62
AC005899.7	0.916495	0.35208	-1.38022	8.32975e-104	2.8499e-103
AC007878.1	0.671836	0.2744	-1.29183	2.97653e-107	1.04781e-106
LINC01775	0.172632	0.577405	1.74188	4.25457e-91	1.26392e-90
UBE2D3-AS1	0.784786	1.85043	1.23749	2.16761e-170	3.06994e-169
SLC12A9-AS1	0.619565	1.34049	1.11344	1.49232e-70	3.49547e-70
AC092115.3	0.0918756	0.580797	2.66028	1.79648e-135	1.01301e-134
AC002398.1	0.850883	1.85823	1.12689	3.21841e-136	1.83179e-135
AC027228.2	0.195912	0.538521	1.45879	7.35279e-85	2.04468e-84
AC018529.2	0.35196	0.929597	1.4012	1.97173e-27	2.77317e-27
TYMSOS	0.700773	1.88402	1.4268	9.36232e-114	3.5414e-113
LINC01607	0.156031	0.384184	1.29996	8.78794e-28	1.24462e-27
AC023983.2	0.215136	1.47085	2.77333	7.54898e-128	3.64868e-127
AC002470.1	0.735424	1.50577	1.03386	6.07861e-79	1.53605e-78
ATP2A1-AS1	0.611725	2.25721	1.88358	1.69964e-158	1.59243e-157
AC010834.3	0.515494	1.15973	1.16977	1.1274e-90	3.31685e-90
LINC00861	0.0746837	0.512767	2.77944	2.49331e-61	5.11255e-61
AC253536.3	0.261929	0.657583	1.328	1.45567e-49	2.52565e-49
AC100791.3	0.0967914	0.676911	2.80602	1.08108e-86	3.04803e-86
MAP4K3-DT	2.82152	1.35272	-1.06061	2.27537e-177	4.07559e-176
PSMD6-AS2	0.74408	0.313893	-1.24518	4.6394e-118	1.8836e-117
AL034376.1	0.228312	3.20484	3.81117	3.40984e-124	1.49395e-123
AL133371.2	0.029416	0.994609	5.07946	6.22008e-212	1.26268e-209
LINC00337	0.0805099	0.707189	3.13486	1.42328e-139	9.02894e-139
AL132989.1	0.257067	1.34691	2.38944	3.08359e-158	2.84531e-157
AL035541.1	0.000425573	1.76289	12.0162	2.03218e-207	3.094e-205
AC115837.1	1.30643	2.81367	1.10683	8.66804e-179	1.70285e-177
ARHGAP27P1-BPTFP1-KPNA2P3	2.94778	0.847565	-1.79823	2.34068e-186	6.47942e-185
AC018752.1	0.0871511	0.911176	3.38614	9.2239e-162	9.20878e-161
AC010680.4	0.967508	0.333538	-1.53642	1.40133e-116	5.61454e-116
GAS5-AS1	0.670745	1.4198	1.08185	2.92644e-138	1.74726e-137
MIR155HG	0.559905	1.33361	1.25209	1.7732e-53	3.19491e-53
AC008969.1	1.53452	0.509435	-1.59082	8.43337e-168	9.87677e-167
AP000695.2	0.168012	0.376926	1.16572	1.98095e-34	2.94963e-34
AC109322.1	0.800355	2.89127	1.85299	4.77934e-179	9.70206e-178
UBAC2-AS1	0.476974	1.25633	1.39723	6.38756e-138	3.77672e-137
NDUFB2-AS1	0.472992	1.20311	1.34688	8.37996e-169	1.04151e-167
AL023881.1	0.182692	0.386241	1.08009	2.23536e-35	3.34481e-35
AC025917.1	1.13426	0.316004	-1.84374	1.45264e-162	1.52527e-161
AC015911.3	0.100657	0.674582	2.74455	5.96574e-81	1.57279e-80
AC106782.5	0.118049	0.397334	1.75096	4.67277e-79	1.19068e-78
OCIAD1-AS1	0.14033	0.775403	2.46612	6.48855e-134	3.5923e-133
LINC01971	0.042845	0.623891	3.8641	3.31465e-137	1.92249e-136
AC093752.1	3.09059	1.41776	-1.12427	3.71349e-194	2.8269e-192
AC145423.2	0.366056	1.3206	1.85106	1.35611e-120	5.65667e-120
LINC01480	0.441345	1.1742	1.41169	3.23901e-58	6.38369e-58
LINC01637	0.568353	1.37535	1.27494	6.31964e-70	1.45783e-69
AC112491.1	3.6159	1.72256	-1.0698	1.42916e-142	9.89046e-142
AC011477.3	0.468534	1.27936	1.44919	3.82372e-113	1.42862e-112
AL355803.1	0.0626548	0.662532	3.40249	3.70377e-179	7.77792e-178
FAM222A-AS1	0.067179	0.723449	3.42881	3.48785e-140	2.28398e-139
AC127502.2	2.63993	0.976012	-1.43553	4.29696e-186	1.13776e-184
LINC00638	0.32458	1.1066	1.76949	2.10128e-129	1.04892e-128
LINC00205	1.2242	2.91664	1.25247	3.53383e-164	3.77562e-163
AC107032.2	0.0897047	0.782153	3.1242	7.9979e-169	1.01473e-167
FAM13A-AS1	2.22615	0.38324	-2.53823	3.35086e-191	1.56975e-189
AL683807.1	0.100206	0.405984	2.01846	2.27935e-64	4.88776e-64
AL122023.1	0.254505	0.970457	1.93097	2.11644e-145	1.5529e-144
AL590369.1	0.141227	0.619312	2.13265	7.24765e-98	2.32306e-97
AC021092.1	0.552127	0.218283	-1.3388	1.07337e-15	1.35059e-15
HAGLROS	0.202655	1.39615	2.78435	2.30522e-119	9.55019e-119
AC020659.1	0.698345	0.143097	-2.28695	6.19824e-66	1.35782e-65
AC092802.2	0.7393	0.256521	-1.52709	3.05066e-82	8.22058e-82
AC012557.2	0.499379	0.182625	-1.45125	4.56275e-64	9.61492e-64
AC092287.1	0.106257	0.439483	2.04825	5.58876e-91	1.65221e-90
AP001922.5	0.247416	0.569917	1.20381	4.2865e-52	7.63298e-52
EPHA5-AS1	0.0583558	0.73642	3.65758	1.22685e-98	4.01695e-98
AC008074.2	0.296242	0.672592	1.18295	5.64938e-57	1.09221e-56
AC012073.1	0.655431	1.48395	1.17893	3.4241e-137	1.96724e-136
LINC02328	0.131209	0.853292	2.70118	4.59389e-149	3.63335e-148
AL121944.1	0.70225	1.50932	1.10384	9.5576e-119	3.93282e-118
AC116025.2	0.078496	0.428788	2.44957	1.76488e-110	6.39768e-110
TONSL-AS1	0.326782	0.961382	1.55678	4.42914e-101	1.47396e-100
AC110285.5	0.0406571	0.654095	4.00792	2.51585e-168	3.00423e-167
AC023813.3	0.105103	0.687401	2.70935	4.83022e-139	2.97132e-138
ATXN2-AS	0.183794	0.608382	1.72689	4.86477e-103	1.65511e-102
LIPE-AS1	1.92186	0.680205	-1.49846	7.63493e-169	9.89292e-168
NPTN-IT1	1.26658	0.485412	-1.38366	4.41367e-153	3.83989e-152
CHKB-DT	0.528236	1.66238	1.654	4.57467e-140	2.96381e-139
AL139407.1	1.02719	0.375724	-1.45096	3.30176e-144	2.36562e-143
ATP6V1B1-AS1	0.204753	0.872867	2.09188	6.18235e-56	1.17658e-55
SLCO4A1-AS1	1.64944	3.73495	1.17912	5.11462e-83	1.39677e-82
LINC02609	0.767378	1.67592	1.12694	6.32875e-94	1.91752e-93
AC011445.1	0.221129	0.566725	1.35776	1.36745e-38	2.0924e-38
AP003390.1	0.22031	0.926212	2.07181	9.47116e-116	3.74541e-115
AC103858.1	0.592433	0.239708	-1.30537	2.46345e-62	5.10287e-62
AC021078.1	3.0858	1.29905	-1.24819	2.58815e-191	1.31349e-189
LINC00539	0.214738	0.604818	1.49392	1.14712e-128	5.63384e-128
OGFRP1	0.239669	0.494776	1.04573	7.13721e-55	1.3333e-54
AC022558.1	0.131591	0.347617	1.40144	9.86907e-59	1.95774e-58
AC004471.1	0.274019	0.570867	1.05888	5.94287e-41	9.37618e-41
AL049552.1	0.232674	0.520895	1.16268	2.84392e-40	4.4409e-40
SLC12A5-AS1	0.0543543	0.512423	3.23687	1.02427e-113	3.85052e-113
AL118522.1	0.277895	0.697642	1.32795	2.07885e-32	3.06543e-32
AC008592.3	0.130122	0.778601	2.58102	1.03895e-131	5.45449e-131
JARID2-AS1	0.223999	0.45319	1.01662	2.20992e-31	3.24299e-31
AC007611.1	0.337774	1.2037	1.83334	5.87846e-133	3.19641e-132
AC009902.2	0.252639	1.76478	2.80433	7.16885e-170	9.70185e-169
AL359076.1	0.863558	1.86501	1.11082	1.8119e-139	1.12596e-138
AC007663.3	0.130183	0.487919	1.9061	6.07775e-93	1.81439e-92
LINC01909	0.302214	0.991328	1.71379	6.49715e-81	1.7055e-80
AC113194.1	0.0451883	1.48627	5.03961	1.66952e-188	5.35125e-187
AC011676.1	0.157502	0.463322	1.55665	1.14254e-67	2.54874e-67
AC007773.1	0.302521	0.852073	1.49394	3.11548e-87	8.86602e-87
AC005330.1	0.130059	0.50052	1.94426	6.72257e-13	8.16535e-13
AC025287.3	1.43298	0.698772	-1.03613	6.38345e-98	2.05689e-97
AC131235.2	0.182687	0.75167	2.04073	1.36428e-127	6.54212e-127
AC127496.5	0.131365	0.969495	2.88365	7.48237e-166	8.28503e-165
ZNF687-AS1	0.418735	1.18009	1.49478	1.28014e-126	5.99698e-126
UPK1A-AS1	0.316061	1.04553	1.72596	3.46367e-45	5.73199e-45
EXOSC10-AS1	0.489272	1.52057	1.6359	1.55521e-123	6.76517e-123
AC004221.1	0.079563	0.463396	2.54208	1.32067e-117	5.32639e-117
AP000704.1	0.145473	0.806436	2.47081	1.66401e-131	8.51581e-131
AC016957.2	0.39446	0.850459	1.10836	3.41946e-59	6.85016e-59
AL355312.3	0.513457	0.155564	-1.72273	2.65887e-82	7.19668e-82
LINC00323	0.265673	0.799186	1.58888	1.65181e-42	2.65423e-42
AL390208.1	1.17141	0.229865	-2.34939	2.84585e-161	2.79536e-160
AC243960.1	0.113535	0.888513	2.96826	2.1243e-110	7.65503e-110
IER3-AS1	0.228315	1.29938	2.50873	1.06155e-171	1.65766e-170
SUCLA2-AS1	0.096965	1.12561	3.53711	6.06979e-195	6.16083e-193
AC011451.1	0.583133	1.80824	1.63269	2.02547e-173	3.24609e-172
C1RL-AS1	1.5609	0.417496	-1.90254	1.7796e-168	2.16755e-167
LINC01502	0.000956599	0.751508	9.61766	1.31774e-170	1.91072e-169
AC138207.2	0.262594	1.08899	2.05208	1.72258e-137	1.0087e-136
SLC5A4-AS1	0.016696	0.744577	5.47885	1.73732e-96	5.42579e-96
AC074212.1	1.31149	0.577266	-1.1839	3.96475e-118	1.62049e-117
AC068025.1	0.0910962	0.578694	2.66734	4.05145e-128	1.97387e-127
LINC01679	1.16385	2.45128	1.07463	6.13658e-88	1.76282e-87
AC016876.2	2.10645	0.614662	-1.77695	4.87909e-191	2.1224e-189
AC046143.2	0.165348	1.3715	3.05218	1.0052e-179	2.18632e-178
AC090515.2	0.20138	0.566204	1.4914	6.37594e-107	2.23158e-106
AATBC	1.64422	0.71961	-1.19212	1.47151e-34	2.19644e-34
AL121820.2	0.707767	2.26314	1.67698	5.15014e-114	1.96027e-113
AC084357.2	0.10381	0.940638	3.17969	7.15329e-177	1.24467e-175
AL121899.1	0.241237	0.760138	1.65581	1.99625e-25	2.78834e-25
PPP3CB-AS1	1.72821	0.703516	-1.29662	4.2312e-178	8.05251e-177
FOXP4-AS1	0.297496	1.21774	2.03327	3.13833e-112	1.15833e-111
AC005696.1	0.651119	1.61717	1.31248	1.07821e-131	5.61224e-131
FMR1-IT1	0.307205	0.629897	1.03591	8.16374e-40	1.27154e-39
AL159166.1	0.0412329	1.359	5.0426	2.40701e-126	1.11898e-125
AL136162.1	0.397589	0.855163	1.10492	1.17993e-76	2.90921e-76
AL096828.3	0.12681	0.835548	2.72005	4.37032e-150	3.50201e-149
AL365361.1	0.129246	0.792851	2.61693	5.80427e-74	1.39165e-73
AC091563.1	0.782073	1.82177	1.21997	7.47367e-90	2.1882e-89
AC010654.1	0.412289	0.93156	1.17599	3.99626e-87	1.13196e-86
AC006058.3	0.36311	1.38688	1.93336	5.33244e-108	1.88806e-107
MCM3AP-AS1	1.67331	0.776235	-1.10814	9.53382e-180	2.15041e-178
AC007387.1	0.111518	0.892979	3.00136	4.59335e-185	1.11894e-183
CARD8-AS1	0.592079	1.7535	1.56638	1.7147e-162	1.76992e-161
AC245884.9	0.257545	0.626296	1.28202	1.79863e-08	2.05125e-08
AC012184.3	0.419417	0.884144	1.0759	5.10483e-97	1.6108e-96
AC010536.1	0.174628	0.357437	1.0334	1.53083e-42	2.46633e-42
AC009779.2	1.18421	3.25218	1.45748	9.06503e-190	3.24741e-188
LINC00513	0.167622	0.494838	1.56175	2.46783e-72	5.84788e-72
AL034346.1	0.114386	0.412572	1.85074	7.65526e-17	9.79422e-17
AL024507.2	0.306835	0.748093	1.28576	3.86704e-81	1.02392e-80
LINC01806	0.426986	0.164118	-1.37946	3.80594e-28	5.41546e-28
CCDC18-AS1	3.70496	1.71073	-1.11485	1.1701e-174	1.97942e-173
